# Supplementary material
Source: Springer Nature journal article supplement (https://www.springermedizin.de/resource/supplementary/12974_2009_198_MOESM4_ESM.pdf/9600980)

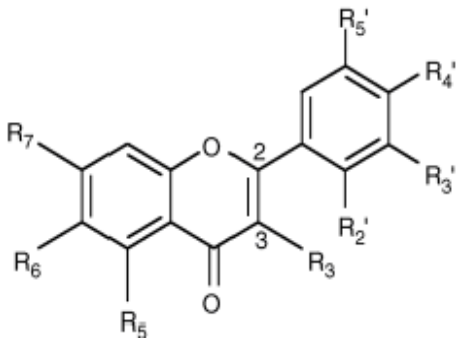

luteolin: R<sub>3</sub>: H

quercetin: R<sub>3</sub>: OH

Supplement: MOESM4 [file 9600980]
